# Supplementary material for: Photosynthetic capacity, leaf respiration and growth in two papaya (Carica papaya) genotypes with different leaf chlorophyll concentrations
Source: PubMed Central journal article supplement (PMC6441136; doi:10.1093/aobpla/plz013), 2019-03-08
Supplement: plz013_suppl_supplementary_information.pdf [file plz013_suppl_supplementary_information.pdf]

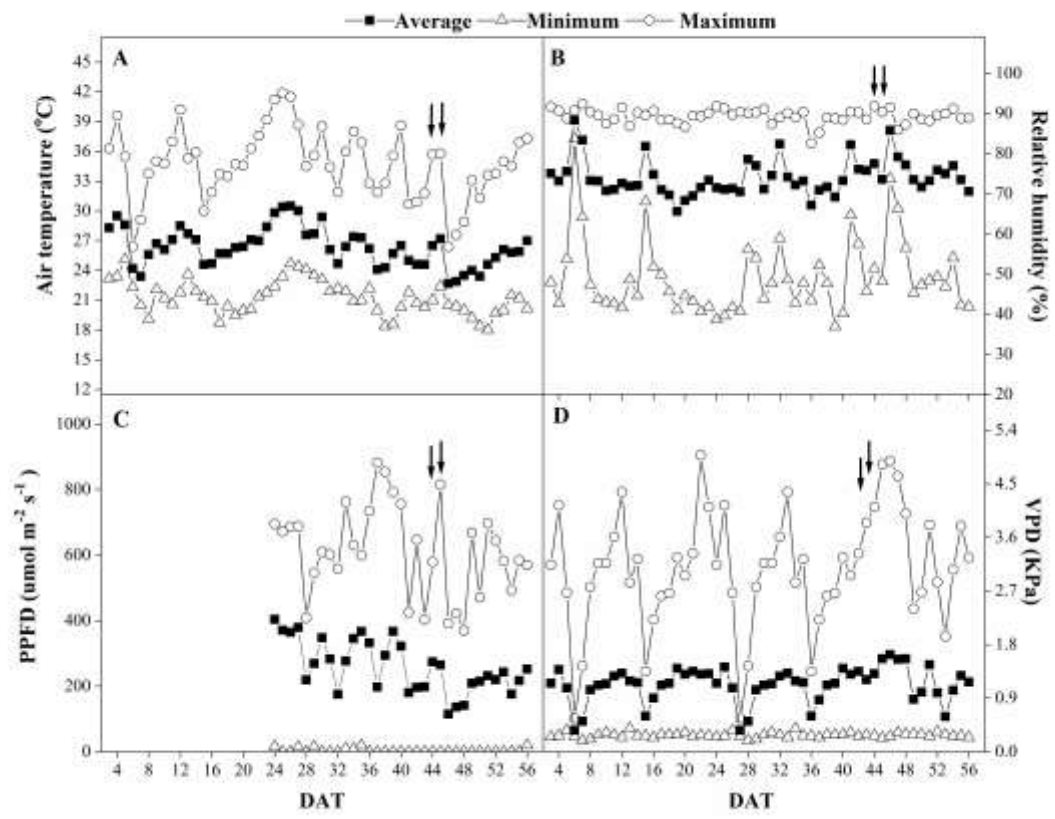

Figure S1

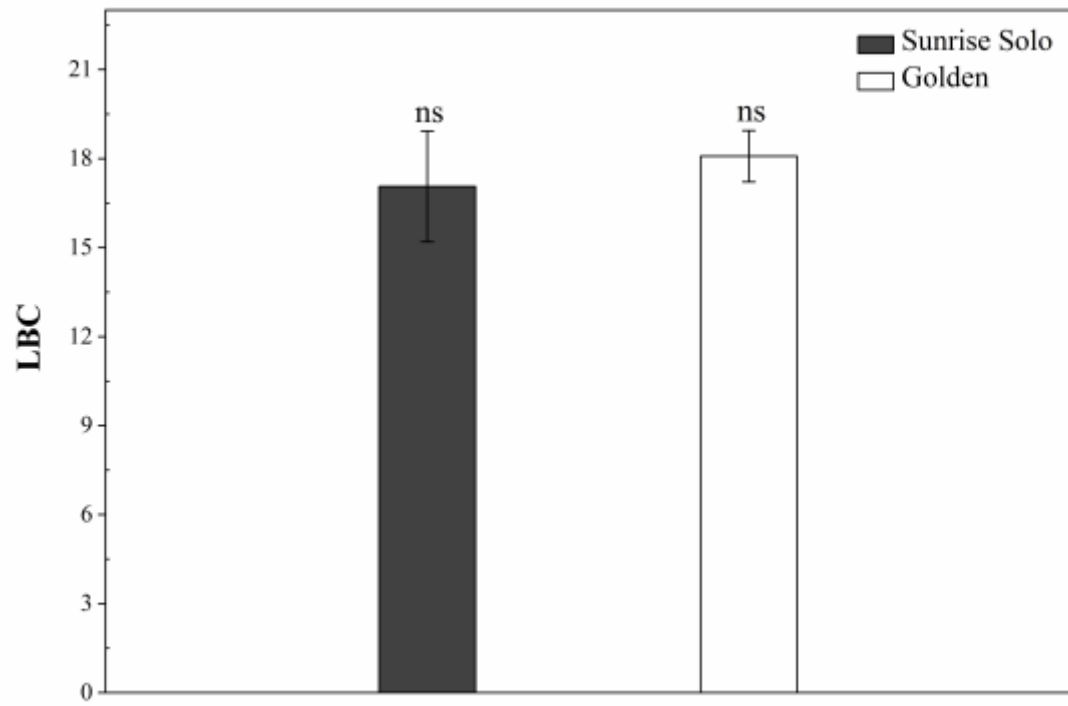

Figure S2

## Supplementary tables

Supplementary Table S1. Intrinsic Water Use Efficiency (*iWUE*) and instantaneous Water Use Efficiency (*WUE*) of two *Carica papaya* genotypes – Golden and Sunrise Solo – (n = 12).

| Genotypes    | <i>iWUE</i>             | $R^2$ | <i>WUE</i>             | $R^2$ |
|--------------|-------------------------|-------|------------------------|-------|
| Sunrise Solo | $y = 18.2540x + 5.3258$ | 0.62  | $y = 2.3535x + 2.7905$ | 0.70  |
| Golden       | $y = 10.6837x + 5.2637$ | 0.56  | $y = 1.6241x + 2.8582$ | 0.50  |

Supplementary Table S2. Changes in SPAD readings and in the fluorescence parameters obtained from a JIP Test analysis of two *Carica papaya* genotypes - Golden (G) and Sunrise Solo (SS) (n=4).

| Genotype                             | 08:00                                          | 12:00                                          | 16:00                                          |
|--------------------------------------|------------------------------------------------|------------------------------------------------|------------------------------------------------|
| <b>ABS/RC</b>                        |                                                |                                                |                                                |
| SS                                   | 1.40 ± 0.05 Aa                                 | 1.57 ± 0.06 Aa                                 | 1.29 ± 0.05 Aa                                 |
| G                                    | 1.43 ± 0.19 Aa                                 | 1.68 ± 0.16 Aa                                 | 1.41 ± 0.11 Aa                                 |
| <b>TR<sub>o</sub>/RC</b>             |                                                |                                                |                                                |
| SS                                   | 1.07 ± 0.02 Aa                                 | 1.10 ± 0.03 Aa                                 | 0.97 ± 0.02 Aa                                 |
| G                                    | 0.94 ± 0.06 Ba                                 | 1.01 ± 0.04 Aa                                 | 0.93 ± 0.04 Aa                                 |
| <b>ET<sub>o</sub>/RC</b>             |                                                |                                                |                                                |
| SS                                   | 0.65 ± 0.01 Aa                                 | 0.68 ± 0.02 Aa                                 | 0.57 ± 0.01 Ab                                 |
| G                                    | 0.38 ± 0.03 Ba                                 | 0.32 ± 0.03 Ba                                 | 0.31 ± 0.03 Ba                                 |
| <b>DI<sub>o</sub>/RC</b>             |                                                |                                                |                                                |
| SS                                   | 0.33 ± 0.02 Aa                                 | 0.47 ± 0.04 Aa                                 | 0.32 ± 0.03 Aa                                 |
| G                                    | 0.48 ± 0.03 Aa                                 | 0.67 ± 0.12 Aa                                 | 0.48 ± 0.07 Aa                                 |
| <b>ET<sub>o</sub>/TR<sub>o</sub></b> |                                                |                                                |                                                |
| SS                                   | 0.60 ± 0.01 Aa                                 | 0.61 ± 0.01 Aa                                 | 0.59 ± 0.01 Aa                                 |
| G                                    | 0.41 ± 0.55 Ba                                 | 0.32 ± 0.30 Ba                                 | 0.34 ± 1.58 Ba                                 |
| <b>ET<sub>o</sub>/ABS</b>            |                                                |                                                |                                                |
| SS                                   | 0.46 ± 0.01 Aa                                 | 0.43 ± 0.01 Aa                                 | 0.44 ± 0.02 Aa                                 |
| G                                    | 0.28 ± 0.78 Ba                                 | 0.20 ± 0.20 Ba                                 | 0.22 ± 0.35 Ba                                 |
| <b>ABS/CS<sub>o</sub></b>            |                                                |                                                |                                                |
| SS                                   | 5900 ± 250 Ab                                  | 7107 ± 249 Aa                                  | 6556 ± 338 Aab                                 |
| G                                    | 5800 ± 122 Ab                                  | 6785 ± 387 Aa                                  | 6359 ± 189 Aab                                 |
| <b>TR<sub>o</sub>/CS<sub>o</sub></b> |                                                |                                                |                                                |
| SS                                   | 4504 ± 149 Aa                                  | 4991 ± 129 Aa                                  | 4920 ± 175 Aa                                  |
| G                                    | 3931 ± 172 Ba                                  | 4132 ± 263 Ba                                  | 4204 ± 42 Ba                                   |
| <b>ET<sub>o</sub>/CS<sub>o</sub></b> |                                                |                                                |                                                |
| SS                                   | 2730 ± 69 Aa                                   | 3088 ± 60 Aa                                   | 2898 ± 67 Aa                                   |
| G                                    | 1641 ± 212 Ba                                  | 1340 ± 175 Ba                                  | 1439 ± 149 Ba                                  |
| <b>RC/CS<sub>o</sub></b>             |                                                |                                                |                                                |
| SS                                   | 4198 ± 86 Ab                                   | 4520 ± 187 Aab                                 | 5061 ± 75 Aa                                   |
| G                                    | 4233 ± 373 Aa                                  | 4115 ± 328 Aa                                  | 4534 ± 183 Aa                                  |
| <b>Área</b>                          |                                                |                                                |                                                |
| SS                                   | 4.50x10 <sup>5</sup> ± 0.23x10 <sup>5</sup> Aa | 5.86x10 <sup>5</sup> ± 1.13x10 <sup>5</sup> Aa | 5.46x10 <sup>5</sup> ± 0.41x10 <sup>5</sup> Aa |
| G                                    | 2.99x10 <sup>5</sup> ± 0.61x10 <sup>5</sup> Aa | 2.13x10 <sup>5</sup> ± 0.66x10 <sup>5</sup> Ba | 2.63x10 <sup>5</sup> ± 0.33x10 <sup>5</sup> Ba |
| <b>F<sub>v</sub>/F<sub>m</sub></b>   |                                                |                                                |                                                |
| SS                                   | 0.78 ± 0.01 Aa                                 | 0.72 ± 0.02 Aa                                 | 0.76 ± 0.02 Aa                                 |
| G                                    | 0.69 ± 0.03 Ba                                 | 0.63 ± 0.03 Ba                                 | 0.68 ± 0.02 Ba                                 |
| <b>PI</b>                            |                                                |                                                |                                                |
| SS                                   | 3.42 ± 0.39 Aa                                 | 2.34 ± 0.33 Aa                                 | 3.41 ± 0.64 Aa                                 |
| G                                    | 1.28 ± 0.36 Ba                                 | 0.55 ± 0.21 Ba                                 | 0.79 ± 0.20 Ba                                 |
| <b>SPAD</b>                          |                                                |                                                |                                                |
| SS                                   | 53.00 ± 0.7 Aa                                 | 53.80 ± 0.9 Aa                                 | 53.30 ± 0.9 Aa                                 |
| G                                    | 34.50 ± 0.8 Ba                                 | 35.70 ± 0.6 Ba                                 | 33.80 ± 0.8 Ba                                 |

Each value represents the mean ± SE (n=4); different letters indicate significant differences among measurement times within each genotype (a, bB) or between genotypes within each measurement time (A, B), by Tukey's test at 5% probability.
